# Supplementary material for: Redox evolution during arc magma differentiation revealed by mineral/melt Fe3+ and Fe2+ partitioning
Source: Research Square preprint supplement (doi:10.21203/rs.3.rs-1540804/v1), 2022-05-09
Supplement: Supplementary file 1 [file 03096c657e7ffef35c75a234.xlsx]

## Sheet: Supplementary Table1-Exp. cond.
Supplementary Table1. Conditions and run products of experiment for MKB composition
Run	Exp.	Capsule	T (°C)	P (GPa)	aH2Oin (wt%)	Buffer	bfO2 (△FMQ)	Duration (hours)	Phases	Fe loss	ΣR2
1	4MKB	Pt	1100	2	5.1	RuRuO2	+6.2	72	Gl(50.1)+Cpx(29.7)+Grt(11.8)+Mag(8.3)	-0.000634539	0.028826
2	3MKB	Pt	1050	2	5	RuRuO2	+6.5	88	Gl(45.9)+Cpx(30.3)+Grt(15.0)+Mag(8.8)	0.000430056	0.0685831
3	10MKB	Pt	1000	2	8.7	RuRuO2	+6.7	98	Gl(50.3)+Cpx(28.1)+Grt(12.5)+Mag(9.1)	-8.1182e-05	0.0025006
4	5MKB	Pt	900	2	9.7	RuRuO2	+7.3	126	Gl(39.5)+Cpx(22.7)+Amp(18.0)+Grt(8.0)+Mag(9.0)+Aln(2.8)	6.44497e-05	0.016088
5	1MKB	Pt	900	2	9.2	RuRuO2	+7.3	119	Gl(39.3)+Cpx(19.2)+Amp(19.2)+Grt(7.8)+Mag(9.1)+Aln(5.4)	-0.000158539	0.000788707
6	9MKB	Pt	1100	1	8.8	RuRuO2	+6.5	75	Gl(90.6)+Spl(9.4)	-5.84269e-05	0.117022
7	13MKB	Pt	1050	1	8.6	RuRuO2	+6.8	86	Gl(89.7)+Spl(10.3)+Amp(quench)	-0.0112203	0.549024
8	11MKB	Pt	1000	1	9.5	RuRuO2	+7.0	99	Gl(81.6)+Cpx(7.9)+Spl(6.8)+Mag(3.8)	0.000353471	0.0410403
9	14MKB-A	Pt	1000	1	5.5	RuRuO2	+7.0	95	Gl(57.6)+Cpx(7.1)+Amp(26.7)+Mag(8.7)	-0.000903417	0.0666787
10	14MKB-B	Pt	1000	1	3.5	RuRuO2	+7.0	95	Gl(59.8)+Cpx(10.1)+Amp(21.2)+Mag(8.9)	-8.94121e-05	0.017259
11	14MKB-C	Pt	1000	1	2	RuRuO2	+7.0	95	Gl(54.1)+Cpx(18.4)+Amp(17.0)+Mag(7.7)+Spl(2.8)	-5.74898e-05	0.0421205
12	6MKB	Pt	900	1	9.8	RuRuO2	+7.7	117	Gl(52.8)+Amp(37.7)+Mag(9.5)	-0.000374666	0.764335
a initial H2O loaded into each capsule
b △FMQ: logfO2 (experiment; O'Neill and Nell, 1997)-logfO2 (FMQ; Frost, 1991)

## Sheet: Supplementary Table2-Rf. data
Supplementary Table2. Collected amphibole and coexisting melt composition data for DFe2+ linear fit from references
Amphibole (n=36)	DFe2+=0.2919* DMg+0.0460 (R2=0.8046, n=36) s.d. =0.14															Mineral Compositions														Melt Compositions
Reference	Run No.	P (GPa)	T (℃)	Capsule	DFeT=DFe2+	DMg	Kd(Fe-Mg)	Ln Kd	10000/T	10000*P/T	10000*(1-2Mg#)/T	Mg#	Fe3+/FeT melt a,b	Comment		SiO2	TiO2	Al2O3	FeO	MnO	MgO	CaO	Na2O	K2O	Cr2O3	NiO	P2O5	Total		SiO2	TiO2	Al2O3	FeO	MnO	MgO	CaO	Na2O	K2O	Cr2O3	NiO	P2O5	Total
Adam 2006	1950	2	1050	Graphite+Pt	0.748783	2.30214	0.325255	-1.12314	7.55772	15.1154	-4.55308	0.80122	n.d.			44.51	2.01	11.32	7.69	0.09	17.22	10.1	2.95	1.3	0.18	0.07	0.04	97.48		39.14	2.76	11.39	10.27	0.19	7.48	8.13	2.92	1.62	0.02	0.01	1.98	85.91
Adam 2006	1951	1	1025	Graphite+Pt	0.778351	2.78421	0.279559	-1.27454	7.70327	7.70327	-4.48255	0.790951	0.0121924	a		42.22	3.42	11.34	7.55	0.09	15.87	11.31	2.66	1.23	0.38	0.04	0.04	96.15		41.36	2.57	12.48	9.7	0.2	5.7	8.35	4.13	1.97	0.02	0.01	1.65	88.14
King 2000	262 IW	2	1100	Graphite	0.731627	2.89199	0.252984	-1.37443	7.28253	14.5651	-3.77716	0.759331	n.d.			42.41	2.65	14.55	8.86	0.11	15.53	9.86	3.34	0.93			0.04	98.28		42.65	2.56	15.5	12.11	0.17	5.37	6.45	4.72	1.11			1.04	91.68
King 2000	3048-84	2	1175	AuPd	0.963605	2.44655	0.393862	-0.931754	6.90536	13.8107	-2.71641	0.696689	0.0739869	b		41.04	3.23	15.45	11.12	0.16	14.19	8.38	3.64	0.94			0.08	98.23		44.71	2.73	16.06	11.54	0.18	5.8	5.73	4.98	1.22			0.98	93.93
King 2000	3048-85	2	1175	AuPd	0.910818	2.57401	0.353852	-1.03888	6.90536	13.8107	-2.75439	0.699439	0.068834	b		41.09	3.4	15.95	11.03	0.16	14.26	8.13	3.7	0.95			0.04	98.71		44.25	2.68	16.8	12.11	0.16	5.54	5.22	5.46	1.62			1.23	95.07
Li et al., 2017	NT72	0.5	950	Au Capsule	1.63385	4.72956	0.345455	-1.06289	8.17561	4.08781	-3.27873	0.700519	0.00893867	a		40.6266	3.35417	13.7058	10.5807	0.326167	13.7496	11.2004	2.51328	0.583833	0.353722	0.064	0.0527778	97.1109		50.9188	1.092	18.1537	6.47592	0.302167	2.90717	6.32708	4.54516	1.70675	0.00425	0.00233333	0.4695	92.9047
Li et al., 2017	NT73	0.5	950	Au Capsule	1.42665	4.35939	0.327259	-1.117	8.17561	4.08781	-3.6595	0.723806	0.0276077	a		41.0735	3.2125	13.1873	9.83117	0.279	14.3133	11.4102	2.49342	0.618917	0.449667	0.0565	0.0333333	96.9588		49.2641	1.32625	17.7547	6.89108	0.304833	3.28333	6.77325	4.29559	1.49975	0.00675	0.0111667	0.442583	91.8533
Li et al., 2017	NT74	0.5	950	Au Capsule	1.26096	4.35937	0.289252	-1.24046	8.17561	4.08781	-4.47002	0.773376	0.00030285	a		41.4256	3.46657	13.1784	7.807	0.245714	14.8011	11.7214	2.51829	0.707571	1.05671	0.0121429	0.0277143	96.9683		48.4935	1.42683	17.7868	6.19133	0.291833	3.39525	7.21983	4.21708	1.50783	0.00933333	0.00416667	0.417833	90.9617
Li et al., 2017	NT75	0.5	950	Au Capsule	1.48244	4.40182	0.336779	-1.08833	8.17561	4.08781	-3.74793	0.729214	0.0219282	a		41.0221	3.17009	13.2581	9.562	0.275364	14.3055	11.5188	2.50373	0.637455	0.539455	0.0430909	0.0248182	96.8605		48.9327	1.37525	17.7044	6.45017	0.295667	3.24992	6.75183	4.26665	1.49792	0.00975	0.004	0.393583	90.9318
Li et al., 2017	NT220	1	975	Au Capsule	1.14381	4.01215	0.285086	-1.25496	8.01186	8.01186	-2.41018	0.650414	0.0481337	a		42.574	0.645	12.4977	13.4576		13.9101	11.1489	2.79038	0.79925	0.03125			97.8542		48.6248	0.339273	15.8544	11.7656	0.012	3.467	6.80336	3.7179	1.51864	0.00727273	0.006		92.1163
Tiepolo 2000	1	1.4	1015	Graphite+Pt	0.919957	3.29841	0.27891	-1.27687	7.76307	10.8683	-3.90437	0.75147	n.d.			40.72	4.06	15.02	8.62	0.12	14.48	10.51	2.59	1.33	0.01			97.46		46.26	2.48	15.96	9.37		4.39	6.37	1.37	1.93				88.13
Tiepolo 2000	2	1.4	1015	Graphite+Pt	1.5602	4.61111	0.338358	-1.08365	7.76307	10.8683	-0.279944	0.518031	n.d.			38.06	4.98	15.53	15.29	0	9.13	9.71	2.46	1.55	0.01			96.72		52.25	1.71	18.91	9.8		1.98	4.6	3.81	3.48				96.54
Tiepolo 2000	3	1.4	1015	Graphite+Pt	0.892186	2.73981	0.325638	-1.12197	7.76307	10.8683	-3.6941	0.737928	n.d.			40.63	3.98	14.69	9.02	0.13	14.11	10.08	2.85	1.14	0.02			96.65		44.93	2.77	15.19	10.11		5.15	6.61	1.79	1.59				88.14
Tiepolo 2000	4	1.4	1015	Graphite+Pt	1.29839	5.18667	0.250332	-1.38497	7.76307	10.8683	-1.86162	0.619902	n.d.			39.36	5.33	14.8	12.88	0.01	11.67	8.84	3.73	0.03	0.01			96.66		50.4	2.07	18.62	9.92		2.25	4.88	4.05	0.06				92.25
Tiepolo 2000	5	1.4	1015	Graphite+Pt	1.32957	5.17593	0.256876	-1.35916	7.76307	10.8683	-2.03031	0.630767	n.d.			39.86	5.44	15.53	11.78	0	11.18	9.2	3.39	0.747	0			97.127		52.37	1.63	18.68	8.86		2.16	4.79	3.01	1.7				93.2
Tiepolo 2000	6	1.4	1015	Graphite+Pt	1.5	5.92	0.253378	-1.37287	7.76307	10.8683	-1.15987	0.574704	n.d.			39.64	5.19	15.44	13.8	0.01	10.36	9.91	2.8	1.2	0.01			98.36		53.02	1.54	18.61	9.2		1.75	4.37	3.18	2.7				94.37
Tiepolo 2000	7	1.4	950	Graphite+Pt	1.73592	6.22549	0.27884	-1.27712	8.17561	11.4459	2.17579	0.366934	n.d.			38.71	3.66	15.4	19.72	0.01	6.35	9.95	2.55	1.66	0			98.01		51.88	1.27	17.09	11.36		1.02	4.33	2.78	3.53				93.26
Tiepolo 2000	8	1.4	1015	Graphite+Pt	1.7153	5.44262	0.315161	-1.15467	7.76307	10.8683	-0.831244	0.553538	n.d.			40.26	5.99	13.63	14.46	0.22	9.96	9.42	3.16	1.3	0.04			98.44		52.22	1.17	19.38	8.43		1.83	2.54	5.39	4.12				95.08
Tiepolo 2000	9	1.4	975	Graphite+Pt	2.12614	5.95333	0.357134	-1.02964	8.01186	11.2166	0.0681986	0.495744	n.d.			38.73	4.94	14.94	16.35	0.01	8.93	9.66	2.93	1.19	0.01			97.69		54.6	1.42	17.96	7.69		1.5	2.93	3.89	3.51				93.5
Tiepolo 2000	10	1.4	1015	Graphite+Pt	1.51702	4.10909	0.369187	-0.996453	7.76307	10.8683	-0.511571	0.532949	n.d.			38.06	5.78	15	14.26	0	9.04	9.86	3.04	1.37	0			96.41		48.15	2.54	15.65	9.4		2.2	3.47	7.56	3.37				92.34
Tiepolo 2000	11	1.4	1035	Graphite+Pt	1.27793	3.17949	0.40193	-0.911477	7.64438	10.7021	-0.968572	0.563352	n.d.			38.87	5.71	15.94	13.84	0	9.92	10.37	3	1.38	0			99.03		47	2.96	15.12	10.83		3.12	4.3	6.85	3.08				93.26
Tiepolo 2000	12	1.4	1055	Graphite+Pt	1.06153	3.25074	0.326549	-1.11917	7.52927	10.541	-1.58414	0.605199	n.d.			39.89	5.72	14.53	12.94	0.01	11.02	10.28	2.75	1.44	0			98.58		45.74	4.17	14.74	12.19		3.39	4.37	6.73	2.82				94.15
Tiepolo 2000	13	1.4	1015	Graphite+Pt	1.26799	3.96226	0.320017	-1.13938	7.76307	10.8683	-0.809645	0.552147	n.d.			40.08	5.03	13.87	15.33	0	10.5	9.56	2.85	1.18	0.01			98.41		48.55	2.55	18.09	12.09		2.65	4.53	4.12	2.77				95.35
Tiepolo 2000	14	1.4	1035	Graphite+Pt	2.17212	7.09924	0.305965	-1.18428	7.64438	10.7021	-0.351054	0.522962	n.d.			39.55	4.39	13.66	15.27	0	9.3	10.09	3.15	1.27	0.03			96.71		54.64	1.43	17.5	7.03		1.31	2.87	4.46	3.56				92.8
Tiepolo 2000	15	1.4	1055	Graphite+Pt	1.23762	4.28226	0.289012	-1.24129	7.52927	10.541	-1.2293	0.581635	n.d.			39.24	5.59	15.22	13.75	0.01	10.62	9.62	2.68	1.42	0.01			98.16		50.4	2.11	15.5	11.11		2.48	3.9	3.49	2.84				91.83
Tiepolo 2000	16	1.4	1075	Graphite+Pt	0.601748	2.27694	0.264279	-1.33075	7.41757	10.3846	-5.51208	0.871556	n.d.			43.44	3.86	12.35	4.82	0.01	18.17	11.32	2.62	1.55	0.01			98.15		41.53	5.39	13.22	8.01		7.98	9.54	2.99	1.38				90.04
Tiepolo 2000	17	1.4	975	Graphite+Pt	2.06054	5.98529	0.344267	-1.06634	8.01186	11.2166	1.04759	0.434623	n.d.			38.7	2.94	15.16	19.06	0.02	8.14	9.57	2.96	1.27	0			97.82		53.2	0.44	19.42	9.25		1.36	2.76	5.15	3.42				95
Tiepolo 2000	18	1.4	1015	Graphite+Pt	1.42513	4.83938	0.294486	-1.22252	7.76307	10.8683	-0.0586208	0.503776	n.d.			38.6	3.84	15.56	16.56	0.01	9.34	9.71	2.79	1.36	0.01			97.78		50.47	0.75	18.52	11.62		1.93	3.67	4.17	3.27				94.4
Tiepolo 2000	19	1.4	1045	Graphite+Pt	1.06613	4.08036	0.261284	-1.34215	7.58639	10.6209	-0.115158	0.50759	n.d.			37.97	5.41	14.53	15.96	0	9.14	9.92	2.74	1.53	0			97.2		48.1	2.35	16.55	14.97		2.24	4.64	3.94	2.84				95.63
Tiepolo 2000	20	1.4	1050	Graphite+Pt	1.06873	4.10947	0.260066	-1.34682	7.55772	10.5808	-3.91793	0.759201	n.d.			39.75	6.35	14.29	7.93	0	13.89	10.71	2.87	1.47	0			97.26		48.52	2.93	17.89	7.42		3.38	5.69	3.96	2.6				92.39
Tiepolo 2000	21	1.4	1050	Graphite+Pt	1.05899	4.27937	0.247464	-1.39649	7.55772	10.5808	-5.84501	0.886692	n.d.			40.44	6.11	14.36	3.77	0	16.39	11.01	3.16	1.14	0.02			96.4		48.37	2.46	19.62	3.56		3.83	5.21	5.38	3.03				91.46
Tiepolo 2000	23	1.4	1030	Graphite+Pt	1.0827	3.79348	0.285411	-1.25382	7.67371	10.7432	-1.06036	0.56909	n.d.			39.82	6.04	14.27	14.27	0.02	10.47	10.05	4.04	0.05	0			99.03		49.69	2.65	18.08	13.18		2.76	4.13	4.35	0.06				94.9
Tiepolo 2000	24	1.4	1030	Graphite+Pt	1.09425	3.71088	0.294876	-1.2212	7.67371	10.7432	-1.3668	0.589058	n.d.			39.45	5.1	14.74	13.7	0	10.91	10.4	3.22	0.94	0.01			98.47		48.52	2.74	16.81	12.52		2.94	4.38	3.29	1.52				92.72
Tiepolo 2000	25	1.4	1030	Graphite+Pt	0.932268	3.80723	0.244868	-1.40704	7.67371	10.7432	-2.30242	0.65002	n.d.			40.4	4.2	13.41	12.25	0.01	12.64	11.19	2.36	1.77	0.03			98.26		43.35	3.15	13.79	13.14		3.32	7.02	3.22	2.18				89.17
Ulmer et al., 2018	ZP1060	1	1060	Graphite+Pt	1	3.21856	0.310698	-1.16893	7.50103	7.50103	-4.33698	0.789092	-0.0280621	a		42.28	1.94	15.32	7.51	0.11	15.61	11.15	2.4	0.71	0.15	0.03		97.21		46.87	1.07	19.33	7.51	0.11	4.85	7.38	3.63	1.55	0.02	0		92.32
Ulmer et al., 2018	ZP1000	1	1000	Graphite+Pt	1.19077	4.00503	0.297319	-1.21295	7.85453	7.85453	-4.51713	0.787549	n.d.			43.27	1.09	15.67	7.74	0.11	15.94	11.12	2.23	0.69	0.21	0.05		98.12		44.67	0.92	20.72	6.5	0.06	3.98	9.01	3.12	1.24	0	0		90.22
acalculated from the ol-oxybarometer (Blundy et al. 2020)
bcalculated from the oxygen fugacity of the experiments (Zhang et al. 2017)
n.d.=not determined because olivine is absent in the experiment

## Sheet: Supplementary Table3-Comp.
Supplementary Table3 Major element compositions of quenched melt(a), clinopyroxene(b), amphibole(c), garnet(d), magnetite(e), spinel(f) and allanite(g).
Supplementary Table3a. Major element compositions, Fe3+/FeT and NBO/T of quenched melts.
Run	n	T(°C)	P(GPa)	SiO2		TiO2		Al2O3		FeO		MnO		MgO		CaO		Na2O		K2O		Cr2O3		NiO		Total		aNBO/T	bFe3+/FeT	cFe3+/FeT
				A.V.	S.D.	A.V.	S.D.	A.V.	S.D.	A.V.	S.D.	A.V.	S.D.	A.V.	S.D.	A.V.	S.D.	A.V.	S.D.	A.V.	S.D.	A.V.	S.D.	A.V.	S.D.	A.V.	S.D.
4MKB	21	1100	2	55.23	0.418318	0.240524	0.0687834	16.986	0.348288	3.16862	0.395922	0.407381	0.0515145	2.35848	0.379305	4.71914	0.524758	5.43	0.204549	2.00986	0.146264	0.006	0.0137295	0.0226667	0.0177576	86.5238	0.927762	0.14032	0.779964	0.746249
3MKB	20	1050	2	57.3009	0.315816	0.2628	0.0155685	16.5838	0.204082	2.77545	0.163543	0.3432	0.0505117	1.8338	0.242142	4.09025	0.281245	5.82	0.368989	2.18175	0.232491	0.0195	0.0186025	0.02475	0.0208904	86.7426	0.568076	0.118267	0.799845	0.771604
10MKB	15	1000	2	55.8284	0.351103	0.1868	0.039555	17.1667	0.133752	2.71433	0.146654	0.309467	0.0428233	2.3928	0.131518	4.49247	0.115374	5.47	0.0735768	2.1292	0.0965462	0.0292	0.0272664	0.0224	0.0169276	86.2317	0.507074	0.129106	0.819597	0.791754
5MKB	24	900	2	59.827	0.614332	0.0897083	0.0268385	17.0245	0.400692	1.36979	0.247542	0.184958	0.0306998	0.995792	0.256316	3.43204	0.180028	4.5	0.182515	1.89283	0.0710436	0.0196667	0.0257068	0.004625	0.00676829	85.8515	0.622164	0.0417212	0.858104	0.816062
1MKB	12	900	2	60.2583	0.416734	0.11175	0.0204323	16.5918	0.180993	1.38858	0.132038	0.189917	0.0422298	1.2185	0.243388	3.54525	0.124585	5.84	0.176594	2.166	0.164452	0.02075	0.0234371	0.0165833	0.018392	86.5527	0.6024	0.0660757	0.858104	0.83735
9MKB	12	1100	1	47.1613	0.42373	0.42175	0.0270727	14.593	0.249849	5.37767	0.189673	0.769083	0.0223137	5.42183	0.273488	8.14808	0.239121	3.51	0.178614	1.12208	0.087719	0.016	0.01411	0.01475	0.0112341	85.6484	0.419818	0.377886	0.796618	0.789218
13MKB	15	1050	1	49.4549	0.401326	0.46	0.0179921	15.8406	0.195949	4.95887	0.210067	0.667333	0.0530359	5.57607	0.289626	8.71873	0.279349	3.7	0.128416	1.09207	0.0851079	0.0193333	0.0200772	0.0212667	0.0173307	88.2534	0.615772	0.364868	0.815469	0.809104
11MKB	17	1000	1	49.855	0.614108	0.366941	0.0196165	16.4328	0.458348	4.18447	0.168463	0.760588	0.053233	5.05118	0.45076	7.72035	0.283007	4.02	0.143279	1.16859	0.144827	0.0224706	0.026479	0.0155294	0.0151043	87.2022	0.931879	0.309964	0.834116	0.825509
14MKB-A	20	1000	1	54.378	0.677289	0.1588	0.0424371	18.0288	0.203682	2.8051	0.233616	0.7075	0.0702788	1.86875	0.7953	6.2634	0.220608	4.68	0.0806329	1.40435	0.118297	0.0216	0.0200929	0.0158	0.0146489	86.5269	0.672235	0.119255	0.834116	0.820224
14MKB-B	20	1000	1	55.0396	0.215891	0.14995	0.0385602	18.1465	0.158823	2.8484	0.122564	0.70705	0.060937	2.8237	0.0771063	6.1185	0.107791	4.76	0.130783	1.53445	0.058365	0.024	0.0247195	0.01985	0.0171166	88.7494	0.402759	0.152498	0.834116	0.819014
14MKB-C	20	1000	1	57.99	0.393622	0.1135	0.029971	18.4751	0.167411	2.44645	0.118201	0.72065	0.0896909	2.1943	0.0523712	5.1212	0.148086	5.22	0.134677	2.07895	0.0386312	0.02465	0.0278535	0.01855	0.0162884	92.0537	0.314743	0.114152	0.834116	0.819227
6MKB	20	900	1	56.7738	0.43625	0.1257	0.0366751	17.9291	0.354784	1.64465	0.11615	0.60145	0.0506967	1.22895	0.351553	5.6944	0.112518	4.8	0.0988029	1.3886	0.0568205	0.01745	0.0221585	0.0202	0.0203278	86.0637	0.450661	0.0820394	0.870231	0.859126
a NBO/T represents melt polymerization degree,NBO/T = (4·XT - 2·XO)/XT, in which NBO is non bridge oxygen, and XT and XO are the atomic proportions of tetrahedrally coordinated cations (Si, Al, Fe3+) and oxygen, respectively.
b Fe3+/FeT ratio in the melt calculated from the experimental fO2 according to Zhang et al. 2017.
c Fe3+/FeT ratio in the melt calculated from the experimental fO2 according to Kress and Carmichael 1991
Supplementary Table3b. Major element compositions of clinopyroxene.
Run	n	T(°C)	P(GPa)	SiO2		TiO2		Al2O3		FeO		MnO		MgO		CaO		Na2O		K2O		Cr2O3		NiO		Total		Mg#	End-member
				A.V.	S.D.	A.V.	S.D.	A.V.	S.D.	A.V.	S.D.	A.V.	S.D.	A.V.	S.D.	A.V.	S.D.	A.V.	S.D.	A.V.	S.D.	A.V.	S.D.	A.V.	S.D.	A.V.	S.D.
4MKB	22	1100	2	47.7388	0.503021	0.269091	0.0629413	11.6209	0.743286	8.68905	0.240484	0.770318	0.151023	10.6396	0.746269	17.409	0.557955	2.52877	0.318573	0.0376818	0.0194505	0.401682	0.0774525	0.190545	0.058452	100.296	0.506875	0.687898	En38.0 Fs17.4 Wo44.6
3MKB	13	1050	2	48.2394	0.494984	0.236231	0.0477077	11.727	1.16585	8.29808	0.408531	0.736462	0.164486	10.3308	1.22284	17.4714	0.613528	2.743	0.543903	0.029	0.0134412	0.332692	0.0858665	0.165846	0.0303256	100.311	0.330996	0.691446	En37.5 Fs16.9 Wo45.6
10MKB	16	1000	2	48.0507	0.374032	0.252313	0.0346405	11.0496	0.468979	7.8255	0.380373	0.641875	0.0628489	10.8719	0.273713	18.0769	0.407703	2.56412	0.13885	0.034625	0.00955598	0.328313	0.0643943	0.1775	0.0415676	99.8739	0.456654	0.714346	En38.5 Fs15.5 Wo46.0
5MKB	10	900	2	46.8961	1.00008	0.2775	0.0545919	10.3865	0.449464	7.576	0.763734	0.1709	0.0312852	9.5432	0.414178	17.4285	0.590904	3.0131	0.178717	0.0132	0.0152665	0.3104	0.040045	0.076	0.0176824	95.6914	0.52412	0.693945	En36.3 Fs16.1 Wo47.6
1MKB	10	900	2	47.9229	0.458029	0.2581	0.0221282	10.211	0.367979	7.1861	0.483284	0.1482	0.0482028	9.6334	0.316045	17.2615	0.663111	3.2616	0.27305	0.0228	0.0141955	0.3157	0.043533	0.0753	0.0214427	96.2966	0.629079	0.707003	En37.0 Fs15.5 Wo47.6
11MKB-L	6	1000	1	51.8858	0.42644	0.0843333	0.00585377	3.3175	0.0434362	4.11783	0.101893	0.728167	0.0391633	17.6053	0.151425	21.9573	0.185613	0.516833	0.0357962	0.00183333	0.00299444	0.0876667	0.0523246	0.0876667	0.0325494	100.39	0.163152	0.885001	En49.3 Fs6.5 Wo44.2
11MKB-H	10	1000	1	48.5698	0.5363	0.2624	0.030981	6.1417	0.420724	6.5555	0.589442	0.6393	0.0865744	14.9807	0.412444	22.0712	0.170691	0.611	0.0463489	0.0015	0.00279881	0.1055	0.0630013	0.0764	0.0331368	100.015	0.28359	0.804435	En43.4 Fs10.7 Wo46.0
14MKB-A	15	1000	1	46.1623	1.12758	0.219867	0.0568103	8.66133	0.779645	7.924	0.669918	0.8958	0.0684076	12.3041	0.533608	21.99	0.193235	0.796133	0.038118	0.0146	0.0121878	0.3214	0.146015	0.116267	0.0189	99.4058	0.420369	0.736494	En37.8 Fs13.7 Wo48.5
14MKB-B	19	1000	1	46.8187	0.88059	0.346737	0.112963	8.26153	0.692268	7.84705	0.883764	0.996947	0.134699	13.4885	0.485745	20.5696	0.625976	0.795632	0.0698858	0.0337368	0.0133743	0.302737	0.118917	0.0977895	0.0383545	99.5589	0.338082	0.755744	En41.3 Fs13.5 Wo45.2
14MKB-C	6	1000	1	46.9687	0.673338	0.4975	0.105388	8.669	0.455885	7.81533	0.366764	1.23933	0.365348	13.0235	0.344545	19.882	0.677023	1.0975	0.044881	0.0433333	0.0144314	0.272	0.072614	0.0898333	0.0246854	99.598	0.48371	0.74997	En41.1 Fs13.8 Wo45.1
Supplementary Table3c. Major element compositions of amphibole.
Run	n	T(°C)	P(GPa)	SiO2		TiO2		Al2O3		FeO		MnO		MgO		CaO		Na2O		K2O		Cr2O3		NiO		Total		Mg#	Classification
				A.V.	S.D.	A.V.	S.D.	A.V.	S.D.	A.V.	S.D.	A.V.	S.D.	A.V.	S.D.	A.V.	S.D.	A.V.	S.D.	A.V.	S.D.	A.V.	S.D.	A.V.	S.D.	A.V.	S.D.
5MKB	16	900	2	42.8658	0.282571	0.396563	0.0185866	17.0689	0.187115	6.86519	0.30339	0.561375	0.0949624	15.2571	0.315557	9.87119	0.269864	3.15494	0.116678	1.10975	0.088973	0.318563	0.0379789	0.32875	0.0509019	97.7981	0.364658	0.800011	Calcic: pargasite
1MKB	24	900	2	43.344	0.313296	0.381417	0.0267986	16.6215	0.237534	6.53517	0.325751	0.567333	0.132109	15.4003	0.214174	10.039	0.134456	3.1545	0.0962565	1.15129	0.061672	0.304792	0.0569752	0.351208	0.065274	97.8505	0.433327	0.809224	Calcic: pargasite
14MKB-A	28	1000	1	41.7676	0.411144	0.597821	0.131411	14.0342	0.406433	7.87107	0.364569	0.67875	0.0632055	16.7195	0.335857	11.4896	0.149299	2.45979	0.0772755	0.628107	0.0357868	0.385964	0.116506	0.207393	0.0646159	96.8399	0.371446	0.792682	Calcic: magnesio-hastingsite
14MKB-B	19	1000	1	41.5663	0.248186	0.542316	0.0705629	14.0256	0.268379	7.98889	0.213682	0.720579	0.115284	16.646	0.333295	11.5445	0.266639	2.48468	0.0781999	0.648579	0.0338367	0.430105	0.0873301	0.233789	0.0685465	96.8313	0.325764	0.789498	Calcic: magnesio-hastingsite
14MKB-C	30	1000	1	40.7239	0.265664	0.671367	0.0877141	15.1725	0.391386	8.56173	0.219307	0.8527	0.120136	15.8144	0.313583	11.1747	0.122933	2.59433	0.0713536	0.700167	0.0316839	0.393	0.129907	0.254767	0.0599256	96.9135	0.323902	0.768774	Calcic: magnesio-hastingsite
6MKB	20	900	1	42.6921	0.459138	0.36605	0.0824841	14.3351	0.30819	7.1085	0.553404	0.9241	0.0692174	16.5102	0.408733	11.7182	0.076549	2.37085	0.0723655	0.64505	0.03452	0.2241	0.093705	0.27	0.0517524	97.1642	0.261006	0.806975	Calcic: magnesio-hastingsite
Data S3d. Major element compositions of garnet.
Run	n	T(°C)	P(GPa)	SiO2		TiO2		Al2O3		FeO		MnO		MgO		CaO		Na2O		K2O		Cr2O3		NiO		Total		Mg#	End-member
				A.V.	S.D.	A.V.	S.D.	A.V.	S.D.	A.V.	S.D.	A.V.	S.D.	A.V.	S.D.	A.V.	S.D.	A.V.	S.D.	A.V.	S.D.	A.V.	S.D.	A.V.	S.D.	A.V.	S.D.
4MKB	11	1100	2	41.328	0.219036	0.0821818	0.039952	23.2443	0.455985	6.51973	0.615555	3.26873	0.196334	18.6575	0.429203	7.02736	0.342189	0.0857273	0.0201151	0.0111818	0.00530694	0.432818	0.0700554	0.0823636	0.0314174	100.74	0.592443	0.837426	Pyr67.3 Grs13.8 Alm7.8 And3.2 Spe6.7
3MKB	21	1050	2	41.5283	0.319912	0.121143	0.0319222	22.8337	0.248115	6.0221	0.218317	3.57114	0.244493	18.4221	0.269786	7.44771	0.27489	0.0772857	0.0203449	0.00719048	0.00395751	0.320286	0.0511392	0.0531905	0.0259049	100.408	0.489617	0.846304	Pyr66.1 Grs14.6 Alm7.4 And3.7 Spe7.3
10MKB	21	1000	2	41.2083	0.350529	0.181714	0.0605336	23.1348	0.364796	5.78005	0.745	3.42914	0.16573	18.887	0.510749	7.58767	0.215828	0.0695238	0.0229839	0.0082381	0.00991416	0.331524	0.0492205	0.0559048	0.0239414	100.68	0.389615	0.854687	Pyr68.3 Grs14.6 Alm4.9 And4.2 Spe7.0
5MKB	24	900	2	41.3444	0.26184	0.129667	0.0354323	23.1978	0.257739	4.75979	0.169688	4.64354	0.36207	17.7428	0.459976	7.80883	0.41306	0.106583	0.0226733	0.00679167	0.00544521	0.23925	0.0520529	0.0379167	0.0276326	100.017	0.330225	0.870294	Pyr64.0 Grs17.4 Alm6.3 And2.1 Spe9.5
1MKB	26	900	2	41.4355	0.362562	0.174154	0.0466225	23.1055	0.467203	4.79688	0.366484	4.95196	0.579971	17.5203	0.786533	7.91358	0.456863	0.135269	0.0245415	0.0120769	0.00802956	0.278846	0.0621248	0.0378077	0.0287736	100.367	0.454603	0.867976	Pyr63.0 Grs17.4 Alm6.4 And2.3 Spe10.1
Supplementary Table3e. Major element compositions of magnetite.
Run	n	T(°C)	P(GPa)	SiO2		TiO2		Al2O3		FeO		MnO		MgO		CaO		Na2O		K2O		Cr2O3		NiO		Total		aCr#	End-member
				A.V.	S.D.	A.V.	S.D.	A.V.	S.D.	A.V.	S.D.	A.V.	S.D.	A.V.	S.D.	A.V.	S.D.	A.V.	S.D.	A.V.	S.D.	A.V.	S.D.	A.V.	S.D.	A.V.	S.D.
4MKB	20	1100	2	0.0547	0.0331807	5.6999	0.296547	5.58825	0.247167	75.5106	1.87455	0.27825	0.0621957	1.2614	0.0824407	0.1017	0.0547464	0.005	0.00881386	0.01	0.00883772	4.1997	2.3835	0.38665	0.0371983	93.1037	0.928611	0.0745823	Spl0.8 Her12.4 Mfr4.3 Mag65.6 Chr6.3 Usp8.1
3MKB	20	1050	2	0.06825	0.0278698	5.6327	0.102111	5.49535	0.0801763	74.8539	1.19046	0.2629	0.0361792	1.2218	0.0495268	0.0585	0.0381307	0.0046	0.00636107	0.0199	0.00711485	3.94375	1.31953	0.3963	0.0475252	91.9627	0.502656	0.070532	Spl0.8 Her12.4 Mfr4.3 Mag66.0 Chr6.0 Usp8.1
10MKB	19	1000	2	0.0593158	0.024081	5.36558	0.189872	4.76721	0.0957488	76.0904	0.889431	0.310474	0.0489323	1.28753	0.047376	0.0645789	0.0572289	0.00842105	0.0100792	0.0120526	0.00764107	3.56589	0.869013	0.417632	0.0417575	91.9578	0.563352	0.0633511	Spl0.7 Her10.7 Mfr4.7 Mag68.2 Chr5.4 Usp7.7
5MKB	19	900	2	0.0868947	0.0259827	4.86574	0.406914	4.28432	0.373634	75.2542	2.91077	0.214263	0.0541047	1.13311	0.0893929	0.0996316	0.0371696	0.00873684	0.011357	0.024	0.0100277	4.04005	3.38754	0.228421	0.036491	90.2393	0.746216	0.0725571	Spl0.6 Her9.9 Mfr4.3 Mag69.9 Chr6.3 Usp7.2
1MKB	10	900	2	0.1043	0.0216336	5.1701	0.184433	4.0022	0.139654	76.3136	1.39671	0.2582	0.0676014	1.1692	0.0597063	0.1162	0.07257	0.0552	0.0295251	0.0381	0.0218197	3.9146	1.64412	0.2923	0.0558451	91.4394	0.587133	0.07	Spl0.6 Her9.1 Mfr4.5 Mag70.2 Chr6.0 Usp7.5
11MKB	10	1000	1	0.0211	0.0160309	6.2305	0.142896	2.112	0.0691359	79.2038	0.606692	0.435	0.0394462	1.9053	0.0697679	0.0127	0.0283159	0.0047	0.0102204	0.001	0.00249444	1.769	0.469389	0.1697	0.026721	91.8648	0.400398	0.0329469	Spl0.5 Her4.7 Mfr7.6 Mag73.1 Chr2.6 Usp8.8
14MKB-A	24	1000	1	0.0867917	0.133733	5.24862	0.677538	2.63696	0.127641	77.4132	0.828826	0.556542	0.0481266	1.59938	0.23478	0.119542	0.0410514	0.00954167	0.0197418	0.0154167	0.0078348	2.01604	1.02293	0.17175	0.0543197	89.8737	0.681358	0.0373665	Spl0.5 Her6.0 Mfr6.6 Mag73.4 Chr3.1 Usp7.6
14MKB-B	19	1000	1	0.0832105	0.0591998	5.16916	0.489311	2.76632	0.115635	77.7784	0.755969	0.566947	0.0711746	1.51468	0.169826	0.0875263	0.0481703	0.0141053	0.0171072	0.0165263	0.00856588	2.07626	0.924772	0.217421	0.0372668	90.2905	0.608073	0.0378251	Spl0.5 Her6.2 Mfr6.2 Mag73.5 Chr3.1 Usp7.4
14MKB-C	20	1000	1	0.08555	0.0602709	5.0759	0.364147	3.40035	0.158915	77.279	0.860415	0.5664	0.0702862	1.4309	0.110757	0.13365	0.0475973	0.0036	0.00676212	0.023	0.00889115	1.9898	0.619669	0.2088	0.0384839	90.197	0.852265	0.035967	Spl0.6 Her7.7 Mfr5.8 Mag72.7 Chr3.0 Usp7.3
6MKB	15	900	1	0.0600667	0.024505	5.05733	1.16011	2.20233	0.159669	78.9972	1.03897	0.686667	0.117027	1.28853	0.330699	0.079	0.0376374	0.0074	0.0108877	0.0122	0.00602613	2.2274	0.879291	0.197667	0.061845	90.8158	0.512961	0.0405644	Spl0.4 Her5.0 Mfr5.4 Mag75.5 Chr3.4 Usp7.3
a Cr#=Cr2O3/(Cr2O3+Al2O3+Fe2O3) in mole.
Supplementary Table3f. Major element compositions of spinel.
Run	n	T(°C)	P(GPa)	SiO2		TiO2		Al2O3		FeO		MnO		MgO		CaO		Na2O		K2O		Cr2O3		NiO		Total		aCr#	End-member
				A.V.	S.D.	A.V.	S.D.	A.V.	S.D.	A.V.	S.D.	A.V.	S.D.	A.V.	S.D.	A.V.	S.D.	A.V.	S.D.	A.V.	S.D.	A.V.	S.D.	A.V.	S.D.	A.V.	S.D.
9MKB	12	1100	1	0.0655	0.0139707	0.346667	0.0198143	7.65583	0.482054	57.2212	1.08296	1.10425	0.0542337	12.2901	0.342488	0.0351667	0.0236982	0.0284167	0.0192659	0.0103333	0.00958534	7.47625	1.22447	1.51508	0.0374493	87.7488	1.1084	0.107125	Spl10.7 Her4.4 Mfr47.8 Mag19.8 Chr2.9 Usp0.1
13MKB	14	1050	1	0.0970714	0.0206229	0.399929	0.0208233	8.64079	0.15511	60.0021	0.805327	2.06021	0.0747613	13.157	0.182103	0.109786	0.0346525	0.00492857	0.00609494	0.0103571	0.0070559	6.36771	0.439824	1.62564	0.0476245	92.4755	0.850778	0.0866261	Spl11.5 Her4.2 Mfr48.8 Mag17.7 Chr2.1 Usp0.1
11MKB	14	1000	1	0.109786	0.025965	0.366857	0.016529	9.01764	0.74485	57.4673	1.10675	2.28686	0.100246	12.9914	0.705832	0.0823571	0.03595	0.00942857	0.0101505	0.00985714	0.00811321	6.76893	1.17185	1.7315	0.0420124	90.8419	1.65283	0.0931646	Spl12.3 Her4.2 Mfr47.9 Mag16.4 Chr2.1 Usp0.1
14MKB-C	11	1000	1	0.0870909	0.0479217	0.158545	0.0161268	25.5904	1.29396	39.0764	0.383013	2.99773	0.200178	13.7976	0.248475	0.039	0.010247	0.0738182	0.0195132	0.0149091	0.00684769	8.51809	1.42284	2.151	0.0647163	92.5045	0.659605	0.106981	Spl32.1 Her10.4 Mfr27.7 Mag8.9 Chr2.3 Usp0.0
a Cr#=Cr2O3/(Cr2O3+Al2O3+Fe2O3) in mole.
Supplementary Table3g. Major element compositions of allanite.
Run	n	T(°C)	P(GPa)	SiO2		TiO2		Al2O3		FeO		MnO		MgO		CaO		Na2O		K2O		Cr2O3		NiO		La2O3		Total
				A.V.	S.D.	A.V.	S.D.	A.V.	S.D.	A.V.	S.D.	A.V.	S.D.	A.V.	S.D.	A.V.	S.D.	A.V.	S.D.	A.V.	S.D.	A.V.	S.D.	A.V.	S.D.	A.V.	S.D.	A.V.	S.D.
5MKB	9	900	2	38.0579	1.51653	0.154889	0.0292978	21.9943	0.512609	8.32656	0.586918	0.801444	0.0861468	1.46133	0.293873	18.5779	0.980736	0.149667	0.075743	0.0752222	0.0492767	0.300778	0.059749	0.0412222	0.0198291	3.256	1.21243	93.2	0.709012
1MKB	7	900	2	36.1521	0.889909	0.190143	0.0843671	22.5529	0.462648	9.55057	0.876616	0.785429	0.114087	1.53657	0.1429	18.3984	0.562355	0.0995714	0.02703	0.053	0.0259037	0.347429	0.0362852	0.0512857	0.0151406	3.00814	0.69665	92.73	0.830028

## Sheet: Supplementary Table4-DFe
Supplementary Table4 DFe3+ and DFe2+ for clinopyroxene(a), amphibole(b), garnet(c), magnetite(d), spinel(e) and orthopyroxene(f) from this study and literatures (italics).
Supplementary Table4a. DFe3+ and DFe2+ for clinopyroxene ( DFe3+/DFe2+=-8.8638+4.9634*DAl+11898/T, n=23, R2=0.76).
Run No.	P	T	10000/T	Fe3+ melt		Fe2+ melt		DFeT		DMg		DFe2+		a(Fe3+/FeT)melt		bDFe3+		DFe3+/DFe2+		NBO/T	DAl		c(Fe3+/FeT)melt		dDFe3+
				A.V.	S.D.	A.V.	S.D.	A.V.	S.D.	A.V.	S.D.	A.V.	S.D.	A.V.	S.D.	A.V.	S.D.	A.V.	S.D.	A.V.	A.V.	S.D.	A.V.	S.D.	A.V.	S.D.
4MKB	2	1100	7.28253	2.74601	0.347075	0.69721	0.180803	2.74222	0.350948	4.51123	0.791524	1.14011	0.266559	0.779964	0.05	3.19419	0.49817	2.80164	0.787388	0.14032	0.684144	0.0459522	0.746249	0.05	3.28699	0.526485
3MKB	2	1050	7.55772	2.46659	0.190706	0.555522	0.142581	2.98981	0.229572	5.63353	0.999007	1.24229	0.324534	0.799845	0.05	3.42712	0.36342	2.7587	0.77779	0.118267	0.707136	0.0708372	0.771604	0.05	3.50708	0.384072
10MKB	2	1000	7.85453	2.47184	0.181291	0.489675	0.138271	2.88303	0.209528	4.5436	0.274686	1.14407	0.100654	0.819597	0.05	3.26579	0.323349	2.85453	0.378087	0.129106	0.643665	0.0277756	0.791754	0.05	3.34041	0.339383
5MKB	2	900	8.52406	1.36979	0.247542	1.24204	0.213304	0.251956	0.0822437	9.58353	2.50161	1.0269	0.596903	0.858104	0.05	6.27553	1.37191	6.11113	3.79512	0.0417212	0.610091	0.0300533	0.816062	0.05	6.54593	1.4489
1MKB	2	900	8.52406	1.38858	0.132038	1.29192	0.130554	0.225853	0.0726748	7.90595	1.60032	1.22779	0.46464	0.858104	0.05	5.82787	0.755722	4.74664	1.89883	0.0660757	0.615423	0.0231721	0.83735	0.05	5.94188	0.778145
11MKB-L	1	1000	7.85453	3.87815	0.252031	0.694136	0.211082	0.984075	0.0465029	3.48539	0.312473	0.983471	0.113823	0.834116	0.05	0.984195	0.0601714	1.00074	0.130988	0.309964	0.201883	0.00622053	0.825509	0.05	0.984203	0.0612551
11MKB-H	1	1000	7.85453	3.87815	0.252031	0.694136	0.211082	1.56663	0.154339	2.96578	0.276972	0.881081	0.101455	0.834116	0.05	1.70296	0.20063	1.93281	0.318409	0.309964	0.373747	0.0276437	0.825509	0.05	1.71153	0.203127
14MKB-A	1	1000	7.85453	2.59975	0.24009	0.465321	0.14551	2.82485	0.335237	6.58415	2.81659	1.27229	0.621136	0.834116	0.05	3.13362	0.453377	2.46298	1.25413	0.119255	0.480417	0.0435837	0.820224	0.05	3.16515	0.465126
14MKB-B	1	1000	7.85453	2.63988	0.175314	0.472504	0.143864	2.7549	0.332141	4.7769	0.215888	1.17083	0.079837	0.834116	0.05	3.06993	0.434456	2.62201	0.411893	0.152498	0.455268	0.0383564	0.819014	0.05	3.10495	0.443828
14MKB-C	1	1000	7.85453	2.26736	0.15711	0.405827	0.123884	3.19456	0.215169	5.93515	0.211472	1.25743	0.0782578	0.834116	0.05	3.57981	0.334008	2.84693	0.319299	0.114152	0.469226	0.0250393	0.819227	0.05	3.62201	0.342641
Related manuscript 1.5-1150	1.5	1150	7.02667	4.56625	0.286751	1.24028	0.269306	1.29567	0.0663544	2.18419	0.0700416	0.697643	0.0264883	0.768168	0.05	1.47616	0.100465	2.11592	0.1649	0.363855	0.503558	0.0375464
Related manuscript 1.5-1220	1.5	1220	6.69725	6.1778	0.380068	1.94218	0.375719	0.799461	0.0204701	1.59493	0.0516459	0.536441	0.019586	0.741118	0.05	0.891337	0.0371885	1.66158	0.0921207	0.621016	0.474792	0.0196027
Related manuscript 2.5-1150a	2.5	1150	7.02667	4.7208	0.296579	1.39111	0.283591	1.2805	0.0470734	2.30965	0.120071	0.729388	0.0450638	0.753342	0.05	1.46094	0.0804966	2.00297	0.165812	0.337166	0.596275	0.0441583
Related manuscript 2.5-1150b	2.5	1150	7.02667	5.10682	0.37288	1.50486	0.313026	0.858302	0.0456448	1.96183	0.172515	0.639157	0.0642271	0.753342	0.05	0.930054	0.0669785	1.45513	0.179895	0.47146	0.374831	0.0185722
Related manuscript 2.5-1150b	2.5	1150	7.02667	5.10682	0.37288	1.50486	0.313026	0.967055	0.0553964	1.79273	0.156948	0.592777	0.0585718	0.753342	0.05	1.0896	0.0828395	1.83813	0.229165	0.47146	0.468859	0.0302448
Related manuscript 2.5-1220	2.5	1220	6.69725	6.20201	0.480165	2.11452	0.3999	0.910113	0.0528021	1.64915	0.176367	0.552107	0.065622	0.725256	0.05	1.04573	0.0841227	1.89408	0.27184	0.553818	0.57874	0.0643586
Related manuscript 2.5-1280a	2.5	1280	6.43853	2.27929	0.159365	0.872385	0.148657	0.864586	0.0458246	2.10841	0.152503	0.67803	0.0569518	0.701621	0.05	0.943923	0.0721898	1.39215	0.158145	0.583095	0.43246	0.049475
Related manuscript 2.5-1280b	2.5	1280	6.43853	4.60601	0.308314	1.76292	0.297791	0.786139	0.0407964	1.69576	0.0814783	0.565441	0.0307599	0.701621	0.05	0.879995	0.0636754	1.5563	0.140887	0.650782	0.50212	0.0489538
Related manuscript 2.5-1280c	2.5	1280	6.43853	6.79573	0.476502	2.60102	0.443485	0.661328	0.0513467	1.40978	0.160431	0.481671	0.0598395	0.701621	0.05	0.737732	0.079601	1.53161	0.252024	0.726502	0.509483	0.0487306
Related manuscript 2.5-1280d	2.5	1280	6.43853	7.89848	0.517365	3.02309	0.508553	0.701164	0.0202246	1.43492	0.0770089	0.489222	0.0290924	0.701621	0.05	0.791296	0.0380446	1.61746	0.123689	0.674718	0.581876	0.0346612
Related manuscript 2.5-1300	2.5	1300	6.35667	7.92256	0.540609	3.14601	0.51914	0.548324	0.0193985	1.06186	0.0418894	0.373415	0.0159094	0.693858	0.05	0.625497	0.0340716	1.67507	0.115839	1.00743	0.56149	0.0514436
Related manuscript 2.5-1350	2.5	1350	6.16086	8.00968	0.662546	3.47496	0.566611	0.508546	0.0379319	1.12673	0.0850887	0.394129	0.0321053	0.674741	0.05	0.5637	0.0596469	1.43024	0.19099	1.05392	0.531771	0.0641373
Related manuscript 2.5-1420	2.5	1420	5.90615	8.28982	0.658423	4.03944	0.600665	0.488763	0.0236399	1.15191	0.0746611	0.402102	0.0282155	0.648753	0.05	0.535683	0.0408309	1.33221	0.138021	1.05656	0.6406	0.0304559
Sorbadere et al. 2018	1.5	1320	6.27687	9.30727	0.615868	3.71346	0.606751	0.534326	0.0181688	1.3393	0.0563274	0.460301	0.0213462	0.692849	0.05	0.567142	0.0289251	1.23211	0.084933	0.898627	0.488066	0.0246171
Sorbadere et al. 2018	1.5	1330	6.23772	8.74722	0.630299	4.1475	0.609273	0.501664	0.0255158	1.34539	0.0430719	0.46216	0.0163556	0.65495	0.05	0.522476	0.0401648	1.13051	0.0956734	0.891001	0.453138	0.0327334
Sorbadere et al. 2018	1.5	1350	6.16086	9.68453	0.872038	3.14392	0.636268	0.471332	0.0423477	1.33992	0.141751	0.460492	0.0530238	0.734914	0.05	0.475242	0.0607221	1.03203	0.177509	0.972626	0.446168	0.0492178
Mallmann & O'Neill 2009	0	1300	6.35667									0.287	0.0145			0.453	0.0158	1.5784	0.0969019	1.49511	0.246	0.026
Davis et al. 2021 PC105	1.5	1350	6.16086	1.52222	0.0437672	4.22	0.0719621	0.694097	0.0286132	1.83099	0.0476614	0.603586	0.0180858	0.245081	0.007	0.972896	0.12979	1.61186	0.220389	0.607354	0.588517	0.0427887
Davis et al. 2021 PC107	1.5	1370	6.08587	1.32222	0.050849	3.8	0.0884086	0.721443	0.180939	1.80934	0.166713	0.597574	0.0621224	0.238477	0.009	1.11699	0.784478	1.86921	1.32708	0.665326	0.54407	0.163273
Davis et al. 2021 PC108	1.5	1380	6.04906	1.35556	0.029692	3.8	0.0710251	0.621514	0.0300321	1.59128	0.0447538	0.535513	0.0169899	0.243028	0.004	0.889386	0.134555	1.66081	0.256729	0.790036	0.549451	0.0235007
Davis et al. 2021 PC247	1.5	1400	5.97675	2.58889	0.0685505	4.18	0.0756453	0.58679	0.0177415	1.43158	0.070355	0.488331	0.0266056	0.357911	0.01	0.763423	0.0692415	1.56333	0.165407	0.950594	0.527018	0.0334019
Data from Sorbadere et al. (2018), Mallmann & O'Neill (2009) and Davis et al. (2021) are not used for DFe3+/DFe2+ linear fit
a Fe3+/FeT ratio in the melt of this study calculated from the experimental fO2 according to Zhang et al. 2017; Fe3+/FeT ratio of reference data are based on Zhang et al. 2017(Related manuscript); Ol oxybarometer (Sorbadere et al. 2018 and Mallmann & O'Neill 2009) ;XANES (Davis et al., 2021)
b DFe3+ calculated from the aFe3+/FeT ratio
c Fe3+/FeT ratio in the melt calculated from the experimental fO2 according to Kress and Carmichael 1991.
d DFe3+ calculated from the cFe3+/FeT ratio
Supplementary Table4b. DFe3+ and DFe2+ for amphibole (DFe3+/DFe2+ average=1.38, n=6, S.D.=0.31).
Run No.	P	T	10000/T	Fe3+ melt		Fe2+ melt		DFeT		DMg		DFe2+		a(Fe3+/FeT)melt		bDFe3+		DFe3+/DFe2+		NBO/T	DAl		c(Fe3+/FeT)melt		dDFe3+
				A.V.	S.D.	A.V.	S.D.	A.V.	S.D.	A.V.	S.D.	A.V.	S.D.	A.V.	S.D.	A.V.	S.D.	A.V.	S.D.	A.V.	A.V.	S.D.	A.V.	S.D.	A.V.	S.D.
5MKB	2	900	8.52406	1.30603	0.223185	0.194369	0.0769715	5.01185	0.932405	15.3215	3.95646	4.38828	1.15449	0.858104	0.05	5.11496	1.10404	1.1656	0.396652	0.0417212	1.00261	0.0260317	0.816062	0.05	5.1524	1.17276
1MKB	2	900	8.52406	1.32394	0.132882	0.197035	0.0719127	4.70636	0.505278	12.6388	2.53062	3.63254	0.738436	0.858104	0.05	4.88392	0.605763	1.34449	0.320171	0.0660757	1.00179	0.0180105	0.83735	0.05	4.91494	0.624947
14MKB-A	1	1000	7.85453	2.59975	0.24009	0.465321	0.14551	2.80599	0.267399	8.94691	3.81185	2.59254	1.1123	0.834116	0.05	2.84843	0.389792	1.0987	0.494781	0.119255	0.778435	0.0241982	0.820224	0.05	2.85277	0.407391
14MKB-B	1	1000	7.85453	2.63988	0.175314	0.472504	0.143864	2.8047	0.142099	5.8951	0.199614	1.73285	0.0582473	0.834116	0.05	3.01786	0.187323	1.74156	0.122934	0.152498	0.772908	0.0162632	0.819014	0.05	3.04155	0.191445
14MKB-C	1	1000	7.85453	2.26736	0.15711	0.405827	0.123884	3.49966	0.19138	7.20702	0.223629	2.10242	0.065255	0.834116	0.05	3.77753	0.250787	1.79676	0.131677	0.114152	0.821239	0.0224535	0.819227	0.05	3.80797	0.256158
6MKB	1	900	8.52406	1.59025	0.130303	0.213424	0.0836024	4.3222	0.454311	13.4344	3.85741	3.85667	1.12559	0.870231	0.05	4.39162	0.549238	1.13871	0.361566	0.0820394	0.799542	0.0233622	0.859126	0.05	4.39853	0.560977
King et al. 2000 3048-87 MH	2	1175	6.90536	5.36734	0.38649	2.22939	0.360394	1.37252	0.0922915	2.59187	0.0819191	0.803508	0.023904	0.49548	0.05	1.95192	0.220721	2.42924	0.284045	0.364902	0.893887	0.0252166
Data from King et al. (2000) is not used for DFe3+/DFe2+ linear fit
a Fe3+/FeT ratio in the melt of this study and King et al. 2000 are calculated from the experimental fO2 according to Zhang et al. 2017
b DFe3+ calculated from the aFe3+/FeT ratio
c Fe3+/FeT ratio in the melt calculated from the experimental fO2 according to Kress and Carmichael 1991.
d DFe3+ calculated from the cFe3+/FeT ratio
Supplementary Table4c. DFe3+ and DFe2+ for garnet (DFe3+/DFe2+ average=0.33, n=12, S.D.=0.06).
Run No.	P	T	10000/T	Fe3+ melt		Fe2+ melt		DFeT		DMg		DFe2+		a(Fe3+/FeT)melt		bDFe3+		DFe3+/DFe2+		NBO/T	DCa		c(Fe3+/FeT)melt		dDFe3+
				A.V.	S.D.	A.V.	S.D.	A.V.	S.D.	A.V.	S.D.	A.V.	S.D.	A.V.	S.D.	A.V.	S.D.	A.V.	S.D.	A.V.	A.V.	S.D.	A.V.	S.D.	A.V.	S.D.
4MKB	2	1100	7.28253	3.0836	0.356387	0.782925	0.198093	2.05759	0.32224	7.91081	1.28522	4.50129	0.750952	0.779964	0.05	1.3682	0.505877	0.303958	0.123296	0.14032	1.48912	0.180767	0.746249	0.05	1.22665	0.547546
3MKB	2	1050	7.55772	2.53346	0.193461	0.570583	0.146245	2.16977	0.150113	10.0459	1.33463	5.7488	0.779824	0.799845	0.05	1.27415	0.389291	0.221637	0.0740912	0.118267	1.82085	0.142098	0.771604	0.05	1.11037	0.425996
10MKB	2	1000	7.85453	2.53174	0.183766	0.501541	0.141501	2.12945	0.297608	7.89326	0.483511	4.49103	0.282516	0.819597	0.05	1.60964	0.408189	0.358412	0.0936446	0.129106	1.68898	0.0647263	0.791754	0.05	1.50831	0.426955
5MKB	2	900	8.52406	1.32815	0.223544	0.197662	0.0780059	3.47483	0.640057	17.8178	4.60949	10.29	2.69332	0.858104	0.05	2.34788	0.984313	0.228172	0.11277	0.0417212	2.27527	0.169498	0.816062	0.05	1.93872	1.11602
1MKB	2	900	8.52406	1.42884	0.135837	0.212646	0.0772368	3.45452	0.421377	14.3786	2.94367	8.28039	1.71999	0.858104	0.05	2.65651	0.655295	0.320819	0.103459	0.0660757	2.23216	0.150863	0.83735	0.05	2.51712	0.69519
Related manuscript 2.5-1150a	2.5	1150	7.02667	4.7208	0.296579	1.39111	0.283591	0.985521	0.0754818	3.89935	0.100276	2.15752	0.0585911	0.753342	0.05	0.601788	0.145151	0.278926	0.0677021	0.337166	0.897753	0.0350353
Related manuscript 2.5-1150b	2.5	1150	7.02667	5.10682	0.37288	1.50486	0.313026	0.74414	0.0377776	2.65776	0.228338	1.43203	0.133418	0.753342	0.05	0.518912	0.089977	0.362361	0.0713272	0.47146	0.848201	0.0111338
Related manuscript 2.5-1220	2.5	1220	6.69725	6.20201	0.480165	2.11452	0.3999	0.719338	0.0381976	2.52873	0.222335	1.35664	0.129911	0.725256	0.05	0.477915	0.0941582	0.352279	0.0771695	0.553818	0.802922	0.0119213
Related manuscript 2.5-1280a	2.5	1280	6.43853	2.27929	0.159365	0.872385	0.148657	0.836357	0.0572306	2.78684	0.0427072	1.50746	0.0249538	0.701621	0.05	0.550958	0.106829	0.365488	0.0711246	0.583095	0.655596	0.0289813
Related manuscript 2.5-1280b	2.5	1280	6.43853	4.60601	0.308314	1.76292	0.297791	0.70086	0.0419509	2.34472	0.040384	1.24912	0.0235964	0.701621	0.05	0.467703	0.0823205	0.374428	0.0662815	0.650782	0.724675	0.0336785
Related manuscript 2.5-1280c	2.5	1280	6.43853	6.79573	0.476502	2.60102	0.443485	0.570441	0.0276791	1.85474	0.156906	0.96281	0.0916804	0.701621	0.05	0.403578	0.0682987	0.419167	0.081395	0.726502	0.727635	0.0502681
Related manuscript 2.5-1280d	2.5	1280	6.43853	7.89848	0.517365	3.02309	0.508553	0.585389	0.0176067	2.13635	0.0839657	1.12736	0.0490612	0.701621	0.05	0.354905	0.0639946	0.314811	0.0583949	0.674718	0.68581	0.0227456
a Fe3+/FeT ratio in the melt of this study and Related manuscript are calculated from the experimental fO2 according to Zhang et al. 2017
b DFe3+ calculated from the aFe3+/FeT ratio
c Fe3+/FeT ratio in the melt calculated from the experimental fO2 according to Kress and Carmichael 1991.
d DFe3+ calculated from the cFe3+/FeT ratio
Supplementary Table4d. DFe3+ and DFe2+ for magnetite (DFe3+/DFe2+=0.9118-769.1/T, n=12, R2=0.83; LnDFe2+=-5.0371+11832.8/T, n=12, R2=0.93.
No.	P	T	10000/T	Fe3+ melt		Fe2+ melt		a(Fe3+/FeT)melt		Fe3+ min		Fe2+ min		bDFe3+		DFe2+		DFe3+/DFe2+		NBO/T	DFeT		eCr#		DMg		c(Fe3+/FeT)melt		dDFe3+
				A.V.	S.D.	A.V.	S.D.	A.V.	S.D.	A.V.	S.D.	A.V.	S.D.	A.V.	S.D.	A.V.	S.D.	A.V.	S.D.	A.V.	A.V.	S.D.	A.V.	S.D.	A.V.	S.D.	A.V.	S.D.	A.V.	S.D.
4MKB	2	1100	7.28253	2.47141	0.347075	0.69721	0.180803	0.779964	0.05	46.189	1.4942	33.947	1.37036	18.6893	2.69339	48.6898	12.7785	0.383845	0.114928	0.14032	23.8308	3.03588	0.315237	0.0991948	0.534837	0.0160387	0.746249	0.05	19.5337	2.84069
3MKB	2	1050	7.55772	2.21993	0.190706	0.555522	0.142581	0.799845	0.05	45.782	0.719897	33.653	0.612611	20.6232	1.8011	60.5791	15.5874	0.340434	0.0925039	0.118267	26.97	1.64607	0.31863	0.0620676	0.666267	0.00632475	0.771604	0.05	21.378	1.90233
10MKB	2	1000	7.85453	2.22466	0.181291	0.489675	0.138271	0.819597	0.05	47.734	0.78312	33.136	0.714939	21.4568	1.78363	67.6694	19.1638	0.317082	0.0935853	0.129106	28.0328	1.54964	0.329855	0.0542907	0.538084	0.00598255	0.791754	0.05	22.2113	1.8816
5MKB	2	900	8.52406	1.17542	0.223185	0.194369	0.0769715	0.858104	0.05	47.461	1.74578	32.542	1.37928	40.3778	7.80934	167.424	66.68	0.241171	0.106778	0.0417212	54.9384	10.1531	0.342129	0.137828	1.13789	0.022732	0.816062	0.05	42.458	8.25095
1MKB	2	900	8.52406	1.19155	0.132882	0.197035	0.0719127	0.858104	0.05	48.444	1.85596	32.718	1.77945	40.6563	4.79411	166.052	61.2737	0.244842	0.0948484	0.0660757	54.9579	5.32175	0.381045	0.0951926	0.95954	0.00881875	0.83735	0.05	41.664	4.94295
11MKB	1	1000	7.85453	3.49033	0.252031	0.694136	0.211082	0.834116	0.05	51.602	1.77515	32.766	1.75716	14.7843	1.18251	47.204	14.5759	0.313199	0.099903	0.309964	18.928	0.775696	0.332935	0.0237807	0.377199	0.00552734	0.825509	0.05	14.9384	1.20185
14MKB-A	1	1000	7.85453	2.33978	0.24009	0.465321	0.14551	0.834116	0.05	50.978	1.76937	31.538	1.73303	21.7875	2.3601	67.7769	21.5192	0.32146	0.10784	0.119255	27.5973	2.31729	0.32206	0.0980808	0.855853	0.00727014	0.820224	0.05	22.1565	2.41259
14MKB-B	1	1000	7.85453	2.3759	0.175314	0.472504	0.143864	0.834116	0.05	51.183	1.76554	31.723	1.73545	21.5426	1.75472	67.1381	20.769	0.32087	0.102643	0.152498	27.306	1.20455	0.321405	0.0937539	0.536418	0.00651048	0.819014	0.05	21.9398	1.80499
14MKB-C	1	1000	7.85453	2.04062	0.15711	0.405827	0.123884	0.834116	0.05	50.5	1.77071	31.838	1.7335	24.7473	2.09361	78.4522	24.3265	0.315445	0.101389	0.114152	31.5882	1.5662	0.276619	0.0578179	0.652099	0.00876178	0.819227	0.05	25.1971	2.1512
6MKB	1	900	8.52406	1.43123	0.130303	0.213424	0.0836024	0.870231	0.05	52.262	0.632752	31.972	0.441086	36.5156	3.35374	149.805	58.7179	0.243754	0.0981303	0.0820394	48.0328	3.45053	0.390829	0.0798492	1.04848	0.00923132	0.859126	0.05	36.9876	3.41434
Related manuscript 2.5-1150a	2.5	1150	7.02667	4.7208	0.296579	1.39111	0.283591			38.4275	0.558777	34.3477	0.55628	8.14004	0.524909	24.6908	5.04931	0.329679	0.0706923	0.337166	12.2224	0.308701	28.2044	5.12883	0.475985	0.0146015
Related manuscript 2.5-1220	2.5	1220	6.69725	6.20201	0.480165	2.11452	0.3999			38.9891	0.368358	34.4716	0.36803	6.28652	0.490319	16.3023	3.08801	0.385622	0.0789949	0.553818	9.0383	0.465514	13.7689	0.719506	0.368859	0.0327471
a Fe3+/FeT ratio in the melt of this study and Related manuscript are calculated from the experimental fO2 according to Zhang et al. 2017
b DFe3+ calculated from the aFe3+/FeT ratio
c Fe3+/FeT ratio in the melt calculated from the experimental fO2 according to Kress and Carmichael 1991.
d DFe3+ calculated from the cFe3+/FeT ratio
e Cr#=Cr2O3/(Cr2O3+Al2O3) in mole
Supplementary Table4e. DFe3+ and DFe2+ for spinel (DFe3+/DFe2+=9.7005-11142.3/T, n=17, R2=0.79; LnDFe2+=-7.4720+12918.7/T, n=17, R2=0.95).
No.	P	T	10000/T	Fe3+ melt		Fe2+ melt		a(Fe3+/FeT)melt		Fe3+ min		Fe2+ min		bDFe3+		DFe2+		DFe3+/DFe2+		NBO/T	DFeT		eCr#		DMg		c(Fe3+/FeT)melt		dDFe3+
				A.V.	S.D.	A.V.	S.D.	A.V.	S.D.	A.V.	S.D.	A.V.	S.D.	A.V.	S.D.	A.V.	S.D.	A.V.	S.D.	A.V.	A.V.	S.D.	A.V.	S.D.	A.V.	S.D.	A.V.	S.D.	A.V.	S.D.
9MKB	1	1100	7.28253	4.28395	0.308429	1.09372	0.271636	0.796618	0.05	53.518	1.55224	9.062	1.2681	12.4927	0.969671	8.2855	2.36195	1.50778	0.44547	0.377886	10.6405	0.425912	0.393573	0.0258043	2.26678	0.130629	0.789218	0.05	12.6098	0.984775
13MKB	1	1050	7.55772	4.0438	0.301364	0.915067	0.250955	0.815469	0.05	57.22	1.48778	8.511	1.32246	14.1501	1.11687	9.30096	2.93173	1.52135	0.494348	0.364868	12.1	0.537688	0.330559	0.0130731	2.35955	0.126834	0.809104	0.05	14.2614	1.13101
11MKB	1	1000	7.85453	3.49033	0.252031	0.694136	0.211082	0.834116	0.05	55.063	1.58204	7.921	1.27104	15.7759	1.22601	11.4113	3.92358	1.38248	0.487331	0.309964	13.7335	0.612903	0.354673	0.0585539	2.57195	0.268708	0.825509	0.05	15.9403	1.2465
14MKB-C	1	1000	7.85453	2.04062	0.15711	0.405827	0.123884	0.834116	0.05	34.612	0.910717	7.934	0.861548	16.9615	1.38004	19.5502	6.33431	0.867586	0.289827	0.114152	15.9727	0.787447	0.182876	0.0324852	6.28794	0.188002	0.819227	0.05	17.2697	1.41904
Related manuscript 1.5-1150	1.5	1150	7.02667	4.56625	0.286751	1.24028	0.269306			41.5912	1.23912	7.10273	0.267695	9.10838	0.633095	5.72671	1.26205	1.59051	0.367536	0.363855	8.3244	0.344797	9.34126	1.3324	2.48186	0.094993
Related manuscript 1.5-1220	1.5	1220	6.69725	6.1778	0.380068	1.94218	0.375719			41.3188	1.90064	5.33268	0.37855	6.68827	0.513773	2.74571	0.565794	2.4359	0.535696	0.621016	5.66762	0.293539	7.3721	0.864579	1.78918	0.089558
Related manuscript 1.5-1250	1.5	1250	6.56534	6.55225	0.414908	2.18507	0.405605			37.9507	0.513433	4.91611	0.185797	5.79202	0.375045	2.24986	0.426201	2.57439	0.515379	0.770687	4.83436	0.103117	17.8057	2.51847	1.53476	0.0231044
Related manuscript 1.5-1300	1.5	1300	6.35667	8.11289	0.530017	2.97178	0.516413			42.3081	0.246583	6.23871	0.217467	5.21493	0.342045	2.09932	0.372071	2.4841	0.469448	0.824258	4.31367	0.0783152	29.3722	1.24261	1.34624	0.044688
Related manuscript 1.5-1300	1.5	1300	6.35667	8.11289	0.530017	2.97178	0.516413			45.6094	0.460443	6.36712	0.204253	5.62185	0.371636	2.14253	0.378603	2.62393	0.495053	0.824258	4.53112	0.0725522	20.6584	1.14021	1.32345	0.0407686
Related manuscript 1.5-1400	1.5	1400	5.97675	7.83623	0.530435	3.41181	0.524918			37.7734	0.832951	4.52281	0.333276	4.82036	0.343168	1.32563	0.226139	3.63627	0.672159	0.934831	6.31354	0.327459	31.7707	2.55408	1.08963	0.0306972
Related manuscript 2.5-1150b	2.5	1150	7.02667	5.10682	0.37288	1.50486	0.313026			35.0484	0.298511	5.83985	0.146043	6.86306	0.504512	3.88065	0.813025	1.76853	0.392667	0.47146	4.8573	0.253216	9.63841	0.895994	2.22731	0.192283
Related manuscript 2.5-1220	2.5	1220	6.69725	6.20201	0.480165	2.11452	0.3999			35.6025	0.832438	7.09556	0.259565	5.74048	0.464258	3.35564	0.646383	1.7107	0.35739	0.553818	4.48974	0.181377	10.4766	3.69889	1.94815	0.172655
Related manuscript 2.5-1280c	2.5	1280	6.43853	6.79573	0.476502	2.60102	0.443485			34.983	0.559848	5.98232	0.202261	5.14779	0.370234	2.29999	0.399794	2.23818	0.421036	0.726502	4.29807	0.153561	2.18702	0.714473	1.53481	0.130146
Related manuscript 2.5-1280d	2.5	1280	6.43853	7.89848	0.517365	3.02309	0.508553			44.5591	0.61433	9.34122	0.291768	5.64147	0.377623	3.08996	0.528685	1.82574	0.335436	0.674718	4.88015	0.0988835	14.1168	2.03508	1.47828	0.0589167
Related manuscript 2.5-1300	2.5	1300	6.35667	7.92256	0.540609	3.14601	0.51914			41.7488	0.875865	5.80076	0.201638	5.26962	0.376192	1.84385	0.310941	2.85794	0.523361	1.00743	4.22084	0.138893	9.34901	2.87452	1.14491	0.0372542
Related manuscript 2.5-1350	2.5	1350	6.16086	8.00968	0.662546	3.47496	0.566611			39.417	0.487758	5.85486	0.206514	4.92117	0.4116	1.68487	0.281082	2.9208	0.545077	1.05392	3.86854	0.215932	7.25985	1.8586	1.15568	0.066316
Related manuscript 2.5-1420	2.5	1420	5.90615	8.28982	0.658423	4.03944	0.600665			33.6023	0.944102	4.92503	0.269373	4.05344	0.341496	1.21923	0.193175	3.32458	0.596583	1.05656	3.05793	0.160878	5.48248	1.22829	1.22785	0.0672789
Sorbadere et al. 2018	1.5	1320	6.27687	9.30727	0.615868	3.71346	0.606751			49.0464	0.525557	5.04828	0.317257	5.26968	0.353241	1.35946	0.237988	3.87632	0.726641	0.898627			22.3724		1.32406
Sorbadere et al. 2018	1.5	1330	6.23772	8.74722	0.630299	4.1475	0.609273			45.4994	0.380963	6.07054	0.301756	5.20159	0.377333	1.46366	0.226989	3.55382	0.608453	0.891001			25.1232		1.32355
Sorbadere et al. 2018	1.5	1350	6.16086	9.68453	0.872038	3.14392	0.636268			51.4913	0.530431	4.31781	0.32531	5.31686	0.481876	1.37338	0.296582	3.87136	0.90666	0.972626			15.0732		1.30995
Sorbadere et al. 2018	1.5	1370	6.08587	9.09138	0.660006	4.17776	0.629221			43.4841	0.399583	5.29432	0.28578	4.783	0.350002	1.26726	0.202753	3.77428	0.664021	0.928847			38.4617		1.2529
Mallmann & O'Neill 2009	0	1300	6.35667											2.18	0.237	0.864	0.0635	2.52315	0.331106	1.45			80.0151	3.68323
Mallmann & O'Neill 2009	0	1300	6.35667											2.88	0.116	1.93	0.0654	1.49223	0.0785451	0.77			1.81442	1.62245
Davis et al. 2021 PC105	1.5	1350	6.16086	1.36644	0.0429059	4.3602	0.073654	0.22	0.007	3.89013	0.479575	6.91888	1.69585	2.8469	0.362171	1.58683	0.38986	1.79409	0.496366	0.607354			0.195181		2.29686	0.040935
Davis et al. 2021 PC106	1.5	1380	6.04906	1.2624	0.0259094	4.12384	0.058775	0.216	0.004	3.7674	0.485885	6.26934	1.59656	2.98432	0.389733	1.52027	0.38776	1.96302	0.562502	0.695417			0.283163		1.98954	0.0321879
Davis et al. 2021 PC107	1.5	1370	6.08587	1.18651	0.049748	3.92214	0.0905255	0.214	0.009	3.52147	0.483623	6.07068	1.58581	2.96792	0.426173	1.5478	0.405898	1.91751	0.5733	0.665326			0.24957		2.10117	0.033862
Davis et al. 2021 PC108	1.5	1380	6.04906	1.22153	0.028137	3.92062	0.0731019	0.219	0.004	3.454	0.530608	4.7414	1.45376	2.82759	0.439235	1.20935	0.371482	2.33811	0.804823	0.790036			0.216647		1.82391	0.0316212
Davis et al. 2021 PC109	1.5	1380	6.04906	1.40862	0.0246878	4.71224	0.065543	0.212	0.003	3.56836	0.521015	5.10848	1.49968	2.53322	0.372531	1.08409	0.31861	2.33673	0.767933	1.04587			0.229448		1.45098	0.0364401
Davis et al. 2021 PC110	1.5	1380	6.04906	1.16454	0.0263361	5.38191	0.0940691	0.163	0.003	2.97178	0.455144	5.9254	1.52823	2.55188	0.395072	1.10098	0.284608	2.31782	0.698398	1.0215			0.234872		1.48898	0.0241326
Davis et al. 2021 PC112	1.5	1380	6.04906	1.02182	0.0294362	4.62036	0.0571952	0.166	0.005	2.10382	0.412128	5.86656	1.49738	2.05889	0.407664	1.26972	0.324463	1.62153	0.524197	0.769668			0.14948		1.90298	0.029334
Davis et al. 2021 PC124	1.5	1380	6.04906	0.804367	0.0305362	3.36607	0.0570794	0.177	0.007	1.573	0.388784	4.6343	1.27313	1.95558	0.48901	1.37677	0.378943	1.42041	0.528208	0.932588			0.33387		1.40492	0.0288435
Davis et al. 2021 PC127	1.5	1380	6.04906	1.30044	0.0709181	5.4796	0.133155	0.176	0.01	3.8764	0.528999	5.32124	1.53547	2.98083	0.438061	0.9711	0.281208	3.06954	0.99678	1.01656			0.234119		1.45695	0.0306603
Davis et al. 2021 PC231	1.5	1380	6.04906	2.5636	0.0728788	7.55276	0.103108	0.234	0.007	8.98693	0.627755	7.99176	2.04004	3.50559	0.264375	1.05812	0.270491	3.31302	0.883003	0.989072			0.218114		1.51059	0.0176608
Davis et al. 2021 PC247	1.5	1400	5.97675	2.32913	0.0679064	4.41378	0.076765	0.322	0.01	7.44871	0.697142	5.01616	1.74309	3.19806	0.3135	1.13648	0.395415	2.81401	1.0172	0.950594			0.253872		1.50105	0.00993246
Davis et al. 2021 CrSpl1300	0.0001	1306	6.33252	1.30363	0.0430894	6.59673	0.205089	0.151	0.003	4.913	0.661208	10.8783	2.86563	3.7687	0.522277	1.64904	0.437416	2.28538	0.683956	0.83604			0.664918		1.33047	0.0388943
Davis et al. 2021 CrSpl1400	0.0001	1400	5.97675	1.64267	0.0645229	8.1216	0.338944	0.154	0.002	5.476	0.484733	8.7616	1.85557	3.3336	0.322837	1.0788	0.232867	3.0901	0.731072	1.23539			0.609208		0.983523	0.0183445
Davis et al. 2018 LOOS2_-2A	0.0001	1225	6.6749	0.439111	0.262762	4.8048	0.530136	0.076	0.05	1.62278	0.271797	11.2395	1.74792	3.6956	2.29642	2.33922	0.446043	1.57984	1.02688	0.611404			0.646829		2.04744	0.136067
Davis et al. 2018 LOOS2_-1B	0.0001	1225	6.6749	0.642056	0.317877	5.77215	0.353109	0.091	0.05	2.83169	0.384135	12.5315	2.17114	4.41035	2.26401	2.17102	0.3989	2.03146	1.10762	0.639763			0.628774		1.87109	0.0523245
Davis et al. 2018 LOOS2_-0.5A	0.0001	1225	6.6749	0.742467	0.30238	5.35178	0.379508	0.111	0.05	4.11611	0.358684	11.7955	1.9113	5.54383	2.30891	2.20403	0.389836	2.51531	1.13814	0.650407			0.629298		1.86983	0.0557909
Davis et al. 2018 LOOS_0B	0.0001	1225	6.6749	0.864733	0.327424	5.76174	0.349488	0.119	0.05	4.25333	0.541905	12.672	2.70452	4.91866	1.96502	2.19934	0.487982	2.23643	1.02201	0.657147			0.612402		1.85629	0.0422498
Davis et al. 2018 LOOS2_0.5A	0.0001	1225	6.6749	1.1592	0.324339	5.39672	0.379649	0.162	0.05	5.871	0.526383	11.8161	2.51627	5.0647	1.48806	2.1895	0.491041	2.31318	0.855006	0.650002			0.637409		1.85006	0.0525569
Davis et al. 2018 LOOS2_1B	0.0001	1225	6.6749	0.945389	0.297994	5.09915	0.314773	0.143	0.05	5.41792	0.439228	12.1139	2.17729	5.73089	1.86521	2.37566	0.451472	2.41233	0.909177	0.634703			0.65149		1.80812	0.04005
Davis et al. 2018 LOOS2_1.5A	0.0001	1225	6.6749	1.50867	0.316886	4.8422	0.388583	0.219	0.05	8.88867	0.508594	11.9002	2.12112	5.89174	1.28262	2.4576	0.480399	2.39735	0.701415	0.641563			0.655413		1.77934	0.0374953
Davis et al. 2018 LOOS2_2A	0.0001	1225	6.6749	2.74489	0.325196	3.9296	0.33299	0.386	0.05	14.95	0.689767	9.945	2.37828	5.44649	0.692468	2.53079	0.642095	2.15209	0.610734	0.597013			0.684345		1.83746	0.0494744
Data from Sorbadere et al. (2018), Mallmann & O'Neill (2009) and Davis et al. (2021, 2018) are not used for DFe3+/DFe2+ and DFe2+ linear fit
a Fe3+/FeT ratio in the melt of this study calculated from the experimental fO2 according to Zhang et al. 2017; Fe3+/FeT ratio of reference data are based on Zhang et al. 2017(Related manuscript); Ol oxybarometer (Sorbadere et al. 2018 and Mallmann & O'Neill 2009) ;XANES (Davis et al., 2018, 2021)
b DFe3+ calculated from the aFe3+/FeT ratio
c Fe3+/FeT ratio in the melt calculated from the experimental fO2 according to Kress and Carmichael 1991.
d DFe3+ calculated from the cFe3+/FeT ratio
e Cr#=Cr2O3/(Cr2O3+Al2O3) in mole
Supplementary Table4f. DFe3+ and DFe2+ for orthopyroxene (DFe3+/DFe2+=-1.0507+1.1344*DAl+1685.4/T, n=21, R2=0.87).
Run No.	P	T	10000/T	Fe3+ melt		Fe2+ melt		DFeT		DMg		DFe2+		a(Fe3+/FeT)melt		DFe3+		DFe3+/DFe2+		NBO/T	DAl
				A.V.	S.D.	A.V.	S.D.	A.V.	S.D.	A.V.	S.D.	A.V.	S.D.	A.V.	S.D.	A.V.	S.D.	A.V.	S.D.	A.V.	A.V.	S.D.
Related manuscript 1.5-1150	1.5	1150	7.02667	4.56625	0.286751	1.24028	0.269306	1.0601	0.12466	4.92048	0.139035	1.42974	0.0377479	0.768168	0.05	0.948546	0.165669	0.663439	0.11719	0.363855	0.431343	0.079754
Related manuscript 1.5-1220	1.5	1220	6.69725	6.1778	0.380068	1.94218	0.375719	0.498454	0.00621539	3.4083	0.103676	1.01921	0.0281479	0.741118	0.05	0.316546	0.0491359	0.310578	0.0489667	0.621016	0.228393	0.00415753
Related manuscript 1.5-1220	1.5	1220	6.69725	6.1778	0.380068	1.94218	0.375719	0.656115	0.0403168	3.25791	0.109109	0.978386	0.029623	0.741118	0.05	0.543542	0.0626666	0.555549	0.0662228	0.621016	0.391587	0.043224
Related manuscript 1.5-1250	1.5	1250	6.56534	6.55225	0.414908	2.18507	0.405605	0.468938	0.0124147	2.8024	0.0382138	0.854727	0.0103751	0.729641	0.05	0.325989	0.0402131	0.381395	0.0472752	0.770687	0.259289	0.0155412
Related manuscript 1.5-1250	1.5	1250	6.56534	6.55225	0.414908	2.18507	0.405605	0.617275	0.0238393	2.65822	0.0357084	0.815584	0.00969484	0.729641	0.05	0.543794	0.0377796	0.666755	0.0469952	0.770687	0.462622	0.0138816
Related manuscript 1.5-1300	1.5	1300	6.35667	8.11289	0.530017	2.97178	0.516413	0.489542	0.01237	2.59593	0.0788885	0.798673	0.0214182	0.71073	0.05	0.363725	0.0362656	0.455411	0.0470211	0.824258	0.414124	0.0148824
Related manuscript 1.5-1400	1.5	1400	5.97675	7.83623	0.530435	3.41181	0.524918	0.340869	0.0096212	2.1775	0.0601578	0.685077	0.0163328	0.673961	0.05	0.174354	0.0412535	0.254502	0.0605223	0.934831	0.267478	0.0113273
Related manuscript 1.5-1400	1.5	1400	5.97675	7.83623	0.530435	3.41181	0.524918	0.433995	0.0265615	2.09827	0.0589663	0.663568	0.0160093	0.673961	0.05	0.322935	0.0474535	0.486664	0.0724702	0.934831	0.455095	0.038229
Related manuscript 2.5-1150b	2.5	1150	7.02667	5.10682	0.37288	1.50486	0.313026	0.669972	0.0323832	4.14887	0.356319	1.22026	0.0967407	0.753342	0.05	0.489796	0.0721221	0.401385	0.0671254	0.47146	0.281062	0.018687
Related manuscript 2.5-1150b	2.5	1150	7.02667	5.10682	0.37288	1.50486	0.313026	0.81243	0.0533643	4.02867	0.347195	1.18763	0.0942634	0.753342	0.05	0.689581	0.0840424	0.580635	0.0844482	0.47146	0.413643	0.0297701
Related manuscript 2.5-1220	2.5	1220	6.69725	6.20201	0.480165	2.11452	0.3999	0.678418	0.0351402	3.71799	0.327225	1.10329	0.0888415	0.725256	0.05	0.517467	0.0714942	0.469022	0.0750037	0.553818	0.389505	0.0191002
Related manuscript 2.5-1220	2.5	1220	6.69725	6.20201	0.480165	2.11452	0.3999	0.816087	0.0455007	3.54941	0.312226	1.05752	0.0847693	0.725256	0.05	0.724625	0.074121	0.68521	0.0890466	0.553818	0.574255	0.0358798
Related manuscript 2.5-1280a	2.5	1280	6.43853	2.27929	0.159365	0.872385	0.148657	0.791645	0.0409647	3.83383	0.0976824	1.13474	0.0265208	0.701621	0.05	0.645737	0.0689237	0.569063	0.0621788	0.583095	0.426964	0.0235244
Related manuscript 2.5-1280b	2.5	1280	6.43853	4.60601	0.308314	1.76292	0.297791	0.596513	0.0413442	3.38436	0.0669567	1.01271	0.0181787	0.701621	0.05	0.419515	0.0729327	0.414248	0.0723999	0.650782	0.30099	0.0461507
Related manuscript 2.5-1280b	2.5	1280	6.43853	4.60601	0.308314	1.76292	0.297791	0.722539	0.019254	3.22553	0.0333197	0.969597	0.0090463	0.701621	0.05	0.617472	0.037384	0.636834	0.0390114	0.650782	0.512617	0.0152726
Related manuscript 2.5-1280c	2.5	1280	6.43853	6.79573	0.476502	2.60102	0.443485	0.574275	0.0395607	2.64468	0.227134	0.811907	0.0616669	0.701621	0.05	0.473218	0.0667049	0.582847	0.093326	0.726502	0.469613	0.066083
Related manuscript 2.5-1280d	2.5	1280	6.43853	7.89848	0.517365	3.02309	0.508553	0.533999	0.0290578	3.02382	0.126902	0.914837	0.0344538	0.701621	0.05	0.37204	0.0585335	0.406673	0.06579	0.674718	0.365319	0.0224268
Related manuscript 2.5-1280d	2.5	1280	6.43853	7.89848	0.517365	3.02309	0.508553	0.649445	0.0239783	2.94637	0.122933	0.893811	0.0333764	0.701621	0.05	0.545523	0.0445587	0.610334	0.0548151	0.674718	0.536285	0.0434574
Related manuscript 2.5-1300	2.5	1300	6.35667	7.92256	0.540609	3.14601	0.51914	0.461385	0.0184211	2.03277	0.0597762	0.645785	0.0162292	0.693858	0.05	0.380024	0.0335092	0.588469	0.0539555	1.00743	0.462988	0.0301222
Related manuscript 2.5-1350	2.5	1350	6.16086	8.00968	0.662546	3.47496	0.566611	0.410837	0.0295183	2.01722	0.117425	0.641566	0.0318809	0.674741	0.05	0.299615	0.0528405	0.467006	0.0855688	1.05392	0.428423	0.0478394
Related manuscript 2.5-1420	2.5	1420	5.90615	8.28982	0.658423	4.03944	0.600665	0.413802	0.0273055	1.96039	0.103669	0.626137	0.0281461	0.648753	0.05	0.29884	0.0513812	0.477276	0.0848188	1.05656	0.518742	0.0497739
Sorbadere et al. 2018	1.5	1320	6.27687	9.30727	0.615868	3.71346	0.606751	0.451613	0.0288305	2.29026	0.0628924	0.715689	0.0170753	0.692849	0.05	0.334544	0.0504517	0.467442	0.0713707	0.898627	0.386831	0.0373437
Sorbadere et al. 2018	1.5	1330	6.23772	8.74722	0.630299	4.1475	0.609273	0.454243	0.0358272	2.27304	0.0412955	0.711014	0.0112117	0.65495	0.05	0.318967	0.0626338	0.448608	0.0883744	0.891001	0.389568	0.0465242
Sorbadere et al. 2018	1.5	1350	6.16086	9.68453	0.872038	3.14392	0.636268	0.424958	0.038601	2.18367	0.21279	0.686754	0.0577726	0.734914	0.05	0.330527	0.0614854	0.481289	0.0982599	0.972626	0.390511	0.0397884
Sorbadere et al. 2018	1.5	1370	6.08587	9.09138	0.660006	4.17776	0.629221	0.41343	0.0284139	2.23161	0.244194	0.699768	0.0662985	0.661994	0.05	0.26723	0.0636826	0.381883	0.0979337	0.928847	0.334507	0.0374544
Mallmann & O'Neill 2009	0	1300	6.35667									0.68	0.0206			0.201	0.0179	0.295588	0.0278049	1.09433	0.0817	0.0089
Data from Sorbadere et al. (2018), Mallmann & O'Neill (2009) are not used for DFe3+/DFe2+ linear fit
a Fe3+/FeT ratio in the melt of reference data are based on Zhang et al. 2017(Related manuscript) and Ol oxybarometer (Sorbadere et al. 2018 and Mallmann & O'Neill 2009)

## Sheet: Supplementary Table5-Modelling
Supplementary Table5 Parameters of redox evolution modeling of a high-Mg basalt (mb) and a high-Mg basaltic andesite (ba)
Run#	T(°C)	10000/T(K)	proportion (wt%)											DFe3+/DFe2+										DFe2+										DFe3+										DMg
			Melt	Olivin	Cpx	Opx	plag	amph	garnet	spl	ilm	Mag		Olivin	Cpx	Opx	plag	amph	garnet	spl	ilm	Mag		Olivin	Cpx	Opx	plag	amph	garnet	spl	ilm	Mag		Olivin	Cpx	Opx	plag	amph	garnet	spl	ilm	Mag		Olivin	Cpx	Opx	plag	amph	garnet
FC mb
rk47-1	1230	6.6527	89.8	9.3						0.9				0						2.28787				1.29421						3.07228				0						7.02896				4.12827
rk51-1	1200	6.78817	92	5.2	2.8									0	0.550977									1.4749	0.560685									0	0.308924									4.70463	1.67857
rk52-1	1170	6.92929	81.6	2.5	15.9					0.1				0	1.62966					1.97968				1.64377	0.579692					4.39179				0	0.944701					8.69435				5.24327	1.74552
rk54-1	1140	7.07639	84.6		13.8					1.6					1.83118					1.81577					0.644241					5.31098					1.17972					9.64353					1.98
rk57-1	1110	7.22987	76.7		18.8	0.7				3.8					1.92198	0.598481				1.64476					0.796162	1.40343				6.4757					1.53021	0.839927				10.651					2.58481	4.82332
rk58-1	1080	7.39016	87.4		9.5	1.7						1.4			2.89897	0.763359						0.343423			0.847186	1.67547						40.7531			2.45597	1.27898						13.9955			2.8092	5.82529
rk73-1	1050	7.55772	94.9		1.5			3.6							2.37234			1.38							1.0096			1.14796							2.39512			1.58419							3.63228			3.77513
rk65-1	1020	7.73305	94.2		2.6			1.5				1.7			2.34199			1.38				0.317051			1.14597			1.34874				61.1463			2.68385			1.86126				19.3865			4.55926			4.46296
rk67-1	990	7.91672	85.4		6			8.3				0.3			2.81302			1.38				0.302925			1.26985			2.07352				75.9892			3.5721			2.86146				23.0191			6.95946			6.94595
PU1048-1	990	7.91672	99		1										2.07738										1.22974										2.55463										5.43866
PU1069-1	980	7.97989	99.4		0.6										2.15398										1.24207										2.67539										5.62979
PU1061-1	950	8.17561	94.4					5.6	0.1						2.40671			1.38	0.33						1.25495			1.78023	2.31931						3.02031			2.45672	0.765373									5.94118	4.17647
PU1063-1	900	8.52406	76.9				1.5	12	9.3		0.3						0	1.38	0.33		0.256215						0.0160318	3.03421	3.52937		2.94287						0.339031	4.18721	1.16469		0.754006						0.0206186	10.2371	6.24742
FC ba
rk48-1	1230	6.6527	100
rk50-1	1200	6.78817	97.8			2.2										0.337699										1.08695										0.367061										3.65763
rk56-1	1170	6.92929	91.8		3.5	4.7									0.487564	0.323217									0.757204	1.22144									0.369186	0.394791									2.42148	4.15302
rk60-1	1140	7.07639	95		3.4	1.6									0.503505	0.328975									0.824836	1.35899									0.415309	0.447075									2.70934	4.65964
rk63-1	1110	7.22987	94.2		4.9	0.9									0.707955	0.381821									0.870394	1.46666									0.616199	0.560001									2.9157	5.0562
rk66-1	1080	7.39016	87.4		9.9	2.7									1.89136	0.531693									0.949966	1.84134									1.79673	0.979028									3.30649	6.43624
rk69-1	1050	7.55772	92.6		1.2			6.2							2.02949			1.38							1.04122			1.22904							2.11314			1.69608							3.82011			4.05291
rk70-1	1020	7.73305	92.7		0.6			6.7							2.57079			1.38							1.11131			1.40561							2.85694			1.93975							4.28904			4.65781
rk71-1	990	7.91672	88.5		1.5			10							3.10324			1.38							1.22468			1.72896							3.80047			2.38597							5.36842			5.76555
PU1049-1	990	7.91672	99					0.9				0.1						1.38				0.302925						1.33018				75.9892						1.83565				23.0191						4.39938
PU1070-1	980	7.97989	98.2					1.8										1.38										1.50132										2.07181										4.98566
PU1062-1	950	8.17561	90.7					9.3	0.1									1.38	0.33									1.80782	2.62834									2.4948	0.867352									6.03571	4.70536
PU1064-1	900	8.52406	76.5				6.4	10.4	6.4		0.3						0	1.38	0.33		0.256215						0.0158315	2.68343	3.37963		27.7924						0.348985	3.70314	1.11528		7.12082						0.0176991	9.0354	5.99115
[truncated: 9 more columns]
